# Supplementary material for: A Sensory Shelf-Life Study for the Evaluation of New Eco-Sustainable Packaging of Single-Portion Croissants
Source: MDPI journal article supplement (doi:10.3390/foods13091390), 2024-04-30
Supplement: s1 [file s1]

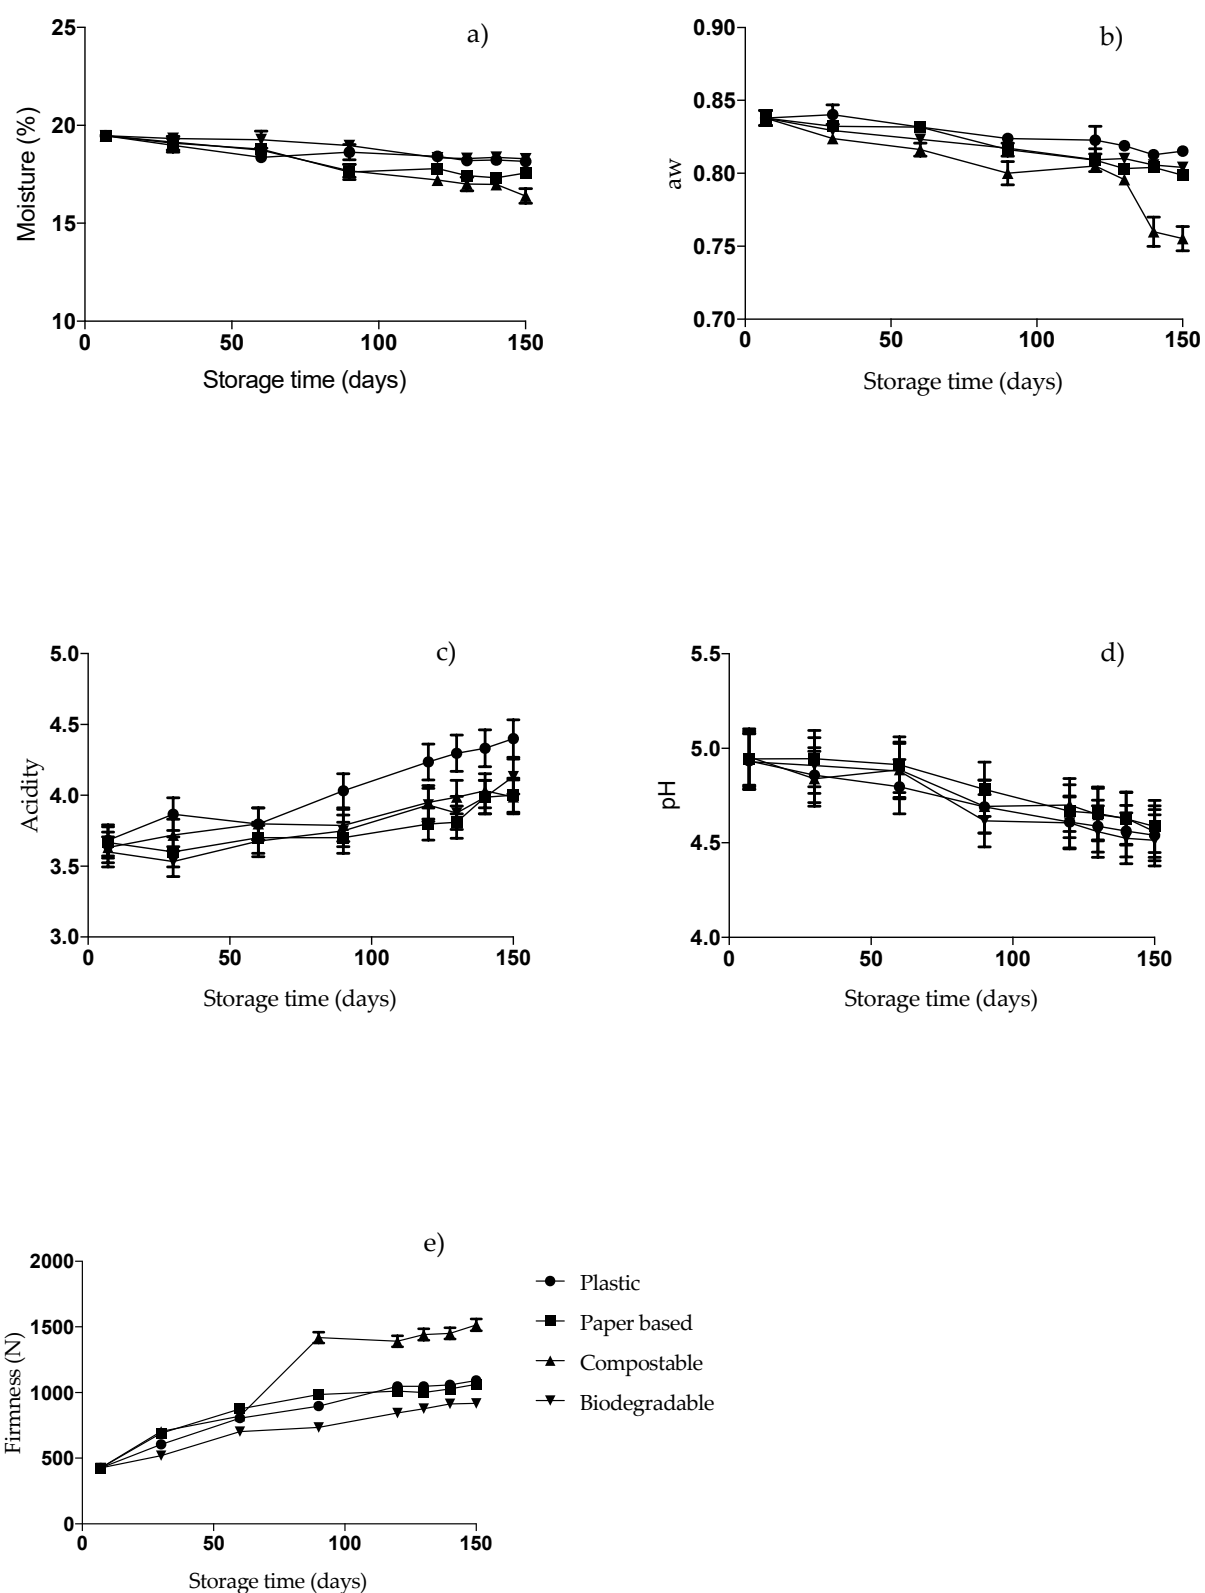

**Figure S1.** Effect of storage time on moisture (a), water activity (b), acidity (c), pH (d) and firmness (e) in croissants sealed within different packaging materials.

**Table S1.** Sensory descriptors and average scores assigned in descriptive sensory analysis for croissants sealed with different films during 150 days of storage

| Days    | Packaging     | Crust color | Crumb color        | Flaking structure | Overall odor       | Alcol odor         | Softness           | Elasticity         | Oiliness           | Stickiness          | Sweetness            | Overall flavor      | Butter flavor       | Vanilla flavor       | Consistency        | Softness in the mouth | Adhesiveness       | Swallowability     |
|---------|---------------|-------------|--------------------|-------------------|--------------------|--------------------|--------------------|--------------------|--------------------|---------------------|----------------------|---------------------|---------------------|----------------------|--------------------|-----------------------|--------------------|--------------------|
| 7       | Plastic       | 61.7        | 50.5 <sup>A</sup>  | 50.1              | 66.8 <sup>aA</sup> | 40.3 <sup>bB</sup> | 65.0 <sup>aA</sup> | 58.0 <sup>aA</sup> | 45.2 <sup>A</sup>  | 35.9 <sup>A</sup>   | 63.5 <sup>aA</sup>   | 64.0 <sup>aA</sup>  | 48.8 <sup>aA</sup>  | 44.0 <sup>abAB</sup> | 37.9 <sup>bB</sup> | 53.9 <sup>bA</sup>    | 35.0 <sup>ab</sup> | 48.8 <sup>bc</sup> |
|         | Paper-based   | 60.8        | 47.2               | 45.3              | 63.8 <sup>a</sup>  | 44.4 <sup>a</sup>  | 56.0 <sup>b</sup>  | 43.8 <sup>b</sup>  | 45.6               | 36.3                | 66.6 <sup>a</sup>    | 64.7 <sup>a</sup>   | 49.2 <sup>ab</sup>  | 40.6 <sup>b</sup>    | 35.8 <sup>ab</sup> | 53.3 <sup>b</sup>     | 40.2 <sup>a</sup>  | 44.1 <sup>ab</sup> |
|         | Compostable   | 66.4        | 50.7               | 46.4              | 61.2 <sup>b</sup>  | 45.9 <sup>a</sup>  | 53.6 <sup>c</sup>  | 54.7 <sup>b</sup>  | 41.6               | 33.6                | 61.0 <sup>b</sup>    | 64.3 <sup>b</sup>   | 46.9 <sup>b</sup>   | 43.6 <sup>b</sup>    | 39.8 <sup>a</sup>  | 50.4 <sup>c</sup>     | 39.0 <sup>ab</sup> | 48.3 <sup>c</sup>  |
|         | Biodegradable | 66.0        | 54.1               | 56.5              | 61.7 <sup>a</sup>  | 41.4 <sup>b</sup>  | 65.0 <sup>a</sup>  | 55.4 <sup>a</sup>  | 43.4               | 40.0                | 66.2 <sup>a</sup>    | 63.3 <sup>a</sup>   | 47.9 <sup>a</sup>   | 44.8 <sup>a</sup>    | 33.4 <sup>c</sup>  | 58.7 <sup>a</sup>     | 37.9 <sup>b</sup>  | 50.5 <sup>a</sup>  |
| 30      | Plastic       | 59.1        | 46.6 <sup>AB</sup> | 45.7              | 64.9 <sup>A</sup>  | 38.8 <sup>B</sup>  | 55.7 <sup>B</sup>  | 52.8 <sup>B</sup>  | 33.2 <sup>B</sup>  | 27.9 <sup>B</sup>   | 59.2 <sup>BCD</sup>  | 62.3 <sup>AB</sup>  | 42.0 <sup>BCD</sup> | 42.5 <sup>BC</sup>   | 40.1 <sup>B</sup>  | 51.5 <sup>A</sup>     | 39.7               | 52.9               |
|         | Paper-based   | 55.1        | 47.1               | 47.4              | 63.0               | 41.6               | 49.2               | 44.1               | 36.9               | 30.2                | 60.7                 | 62.4                | 43.2                | 40.5                 | 36.4               | 53.5                  | 39.6               | 57.4               |
|         | Compostable   | 55.8        | 44.4               | 41.8              | 60.2               | 44.9               | 45.9               | 44.7               | 36.2               | 30.5                | 56.4                 | 60.4                | 41.9                | 37.6                 | 39.2               | 53.3                  | 39.9               | 51.9               |
|         | Biodegradable | 61.6        | 48.3               | 54.9              | 67.0               | 35.5               | 57.3               | 51.9               | 36.0               | 33.8                | 61.3                 | 63.0                | 42.4                | 39.6                 | 32.0               | 60.1                  | 36.5               | 54.7               |
| 60      | Plastic       | 55.1        | 44.6 <sup>AB</sup> | 51.6              | 58.3 <sup>B</sup>  | 39.4 <sup>B</sup>  | 47.3 <sup>B</sup>  | 38.7 <sup>D</sup>  | 27.6 <sup>BC</sup> | 22.8 <sup>CD</sup>  | 57.9 <sup>BCD</sup>  | 57.1 <sup>D</sup>   | 44.6 <sup>BC</sup>  | 37.0 <sup>CD</sup>   | 41.2 <sup>B</sup>  | 53.9 <sup>A</sup>     | 33.5               | 48.1               |
|         | Paper-based   | 52.5        | 43.3               | 45.0              | 59.5               | 44.1               | 47.3               | 37.5               | 37.8               | 23.2                | 59.9                 | 56.6                | 42.8                | 37.5                 | 42.4               | 48.7                  | 36.2               | 51.8               |
|         | Compostable   | 56.3        | 41.9               | 50.7              | 56.6               | 39.0               | 43.5               | 35.5               | 31.2               | 24.2                | 56.4                 | 56.6                | 43.8                | 38.1                 | 42.1               | 53.3                  | 34.1               | 52.3               |
|         | Biodegradable | 59.3        | 46.6               | 51.9              | 58.3               | 39.5               | 55.7               | 46.9               | 29.4               | 22.7                | 62.2                 | 59.5                | 44.3                | 41.3                 | 31.1               | 57.8                  | 33.8               | 55.2               |
| 90      | Plastic       | 64.9        | 51.1 <sup>AB</sup> | 57.2              | 58.8 <sup>B</sup>  | 49.5 <sup>A</sup>  | 49.9 <sup>B</sup>  | 45.3 <sup>CD</sup> | 33.4 <sup>B</sup>  | 19.5 <sup>CDE</sup> | 62.0 <sup>AB</sup>   | 58.2 <sup>AB</sup>  | 43.8 <sup>AB</sup>  | 43.2 <sup>A</sup>    | 53.3 <sup>A</sup>  | 53.6 <sup>A</sup>     | 36.1               | 47.6               |
|         | Paper-based   | 60.8        | 44.5               | 52.2              | 56.2               | 49.6               | 54.4               | 43.6               | 35.1               | 24.1                | 63.5                 | 64.6                | 45.4                | 45.4                 | 54.3               | 51.5                  | 40.9               | 52.2               |
|         | Compostable   | 61.1        | 46.2               | 46.5              | 56.5               | 53.2               | 46.3               | 39.6               | 36.1               | 20.4                | 59.6                 | 63.8                | 46.4                | 46.6                 | 57.3               | 41.6                  | 35.4               | 43.9               |
|         | Biodegradable | 62.6        | 49.5               | 52.0              | 62.3               | 51.4               | 58.5               | 42.8               | 31.5               | 23.4                | 66.7                 | 65.8                | 48.9                | 51.9                 | 52.8               | 61.6                  | 35.2               | 50.4               |
| 120     | Plastic       | 58.9        | 41.9 <sup>B</sup>  | 52.9              | 60.1 <sup>B</sup>  | 51.9 <sup>A</sup>  | 40.4 <sup>C</sup>  | 43.7 <sup>CD</sup> | 27.3 <sup>D</sup>  | 27.1 <sup>CD</sup>  | 58.3 <sup>ABC</sup>  | 60.1 <sup>BCD</sup> | 43.3 <sup>D</sup>   | 39.4 <sup>D</sup>    | 52.6 <sup>A</sup>  | 40.2 <sup>B</sup>     | 37.1               | 45.8               |
|         | Paper-based   | 58.2        | 38.3               | 45.8              | 54.2               | 51.8               | 37.5               | 37.4               | 24.9               | 24.9                | 62.9                 | 59.2                | 35.5                | 33.6                 | 57.7               | 39.8                  | 32.6               | 47.5               |
|         | Compostable   | 61.3        | 39.4               | 48.6              | 54.0               | 56.4               | 34.2               | 38.8               | 24.9               | 23.7                | 57.1                 | 56.1                | 35.2                | 32.9                 | 52.0               | 34.3                  | 35.8               | 42.6               |
|         | Biodegradable | 60.6        | 39.6               | 48.9              | 59.2               | 48.2               | 43.1               | 47.4               | 24.4               | 20.5                | 63.8                 | 59.3                | 39.2                | 35.7                 | 40.4               | 46.1                  | 36.1               | 45.0               |
| 130     | Plastic       | 61.7        | 39.3 <sup>AB</sup> | 57.9              | 59.1 <sup>B</sup>  | 46.3 <sup>A</sup>  | 41.5 <sup>C</sup>  | 45.7 <sup>BC</sup> | 23.9 <sup>D</sup>  | 23.4 <sup>DE</sup>  | 63.3 <sup>ABCD</sup> | 59.6 <sup>CD</sup>  | 41.7 <sup>CD</sup>  | 39.3 <sup>BCD</sup>  | 51.1 <sup>A</sup>  | 41.4 <sup>B</sup>     | 35.7               | 48.1               |
|         | Paper-based   | 60.1        | 41.1               | 47.7              | 59.1               | 53.1               | 37.7               | 40.3               | 27.1               | 21.5                | 61.7                 | 60.4                | 39.7                | 37.3                 | 53.0               | 36.3                  | 39.3               | 51.9               |
|         | Compostable   | 64.3        | 37.6               | 48.3              | 47.2               | 50.1               | 35.1               | 44.4               | 25.4               | 20.3                | 58.1                 | 52.1                | 36.2                | 37.8                 | 58.5               | 34.7                  | 36.3               | 45.3               |
|         | Biodegradable | 64.7        | 42.3               | 54.1              | 58.3               | 46.7               | 38.7               | 47.2               | 25.6               | 16.3                | 57.4                 | 60.7                | 39.7                | 43.3                 | 52.1               | 42.7                  | 34.9               | 50.7               |
| 140     | Plastic       | 60.1        | 38.1 <sup>B</sup>  | 47.0              | 55.4 <sup>B</sup>  | 45.7 <sup>A</sup>  | 41.7 <sup>C</sup>  | 45.1 <sup>BC</sup> | 27.5 <sup>CD</sup> | 27.3 <sup>C</sup>   | 58.3 <sup>CD</sup>   | 53.5 <sup>D</sup>   | 46.7 <sup>BCD</sup> | 35.2 <sup>CD</sup>   | 53.2 <sup>A</sup>  | 41.7 <sup>B</sup>     | 36.1               | 48.3               |
|         | Paper-based   | 60.8        | 38.5               | 52.3              | 56.2               | 52.7               | 36.5               | 43.7               | 27.8               | 26.5                | 59.3                 | 58.5                | 46.4                | 35.5                 | 52.9               | 35.3                  | 37.7               | 49.7               |
|         | Compostable   | 64.0        | 38.1               | 49.1              | 54.4               | 52.8               | 32.9               | 44.7               | 28.1               | 27.8                | 54.5                 | 55.6                | 32.6                | 33.6                 | 58.4               | 31.9                  | 38.1               | 50.3               |
|         | Biodegradable | 63.7        | 38.3               | 53.5              | 55.9               | 49.5               | 37.3               | 48.7               | 22.5               | 23.0                | 59.4                 | 57.5                | 45.7                | 42.2                 | 52.5               | 41.7                  | 31.6               | 52.3               |
| 150     | Plastic       | 62.8        | 38.4 <sup>B</sup>  | 49.2              | 57.8 <sup>B</sup>  | 50.2 <sup>A</sup>  | 38.9 <sup>C</sup>  | 32.7 <sup>E</sup>  | 33.8 <sup>B</sup>  | 19.5 <sup>E</sup>   | 56.9 <sup>D</sup>    | 59.4 <sup>D</sup>   | 41.0 <sup>CD</sup>  | 36.5 <sup>CD</sup>   | 51.4 <sup>A</sup>  | 39.4 <sup>B</sup>     | 36.9               | 45.5               |
|         | Paper-based   | 62.4        | 38.6               | 47.7              | 54.8               | 49.1               | 38.6               | 33.5               | 32.0               | 17.5                | 54.6                 | 55.9                | 41.5                | 37.9                 | 55.7               | 39.8                  | 34.6               | 50.3               |
|         | Compostable   | 58.9        | 37.7               | 46.0              | 53.3               | 55.9               | 32.3               | 30.9               | 34.5               | 19.8                | 53.8                 | 49.8                | 41.6                | 34.8                 | 58.1               | 31.9                  | 40.2               | 41.9               |
|         | Biodegradable | 63.0        | 42.1               | 53.1              | 53.7               | 50.5               | 37.0               | 36.4               | 30.1               | 17.8                | 57.5                 | 59.9                | 39.1                | 37.1                 | 52.1               | 36.7                  | 32.6               | 51.8               |
| p value | Packaging (P) | n.s.        | n.s.               | n.s.              | ≤0.0001            | ≤0.0001            | ≤0.0001            | ≤0.0001            | n.s.               | n.s.                | ≤0.001               | ≤0.001              | ≤0.05               | ≤0.001               | ≤0.0001            | ≤0.0001               | ≤0.01              | ≤0.0001            |
|         | Storage (S)   | n.s.        | ≤0.0001            | n.s.              | ≤0.0001            | ≤0.0001            | ≤0.0001            | ≤0.0001            | ≤0.0001            | ≤0.0001             | ≤0.0001              | ≤0.0001             | ≤0.0001             | ≤0.0001              | ≤0.0001            | ≤0.0001               | n.s.               | n.s.               |
|         | P × S         | n.s.        | n.s.               | n.s.              | n.s.               | n.s.               | ≤0.0001            | ≤0.01              | n.s.               | ≤0.05               | n.s.                 | n.s.                | n.s.                | n.s.                 | ≤0.001             | ≤0.0001               | ≤0.05              | ≤0.05              |

Means with different capital letters in the same column or small letters in the same row differ statistically according to Tukey's test ( $p \leq 0.05$ )
